# Supplementary material for: Ultrasensitive glucose detection from tears and saliva through integrating a glucose oxidase-coupled DNAzyme and CRISPR–Cas12a
Source: Royal Society of Chemistry journal article supplement (doi:10.1039/d1an01385h), 2021-01-01
Supplement: d1an01385h1.pdf [file d1an01385h1.pdf]

## Supporting Information

**Table S1. Details of the sequences used in the experiment**

| Title   | Sequences (5'-3')                                                            |
|---------|------------------------------------------------------------------------------|
| cisPLDz | GAG ATC TTT CTA ATA CGA CTC AGA ATG AGT CTG GGCCTC TTT<br>CTT TTA GAA AGA AC |
| Part-b  | GAG ATC TTT CTA ATA CGA                                                      |
| sgRNA   | UAA UU <u>UCUAC</u> UAA GU <u>GUAGA</u> U <b>ACG TAT TAG AAA GAT CTC</b>     |

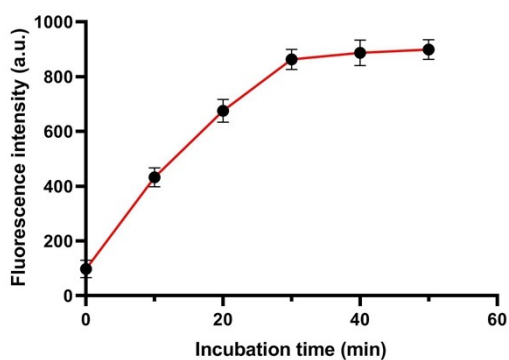

**Figure S1.** Fluorescence intensity of the sensing system with different incubation time of Cas12a enzyme.
